## **Hierarchical Stem Cell Topography Splits Growth and Homeostatic Functions in the Fish Gill.**

Julian Stolper<sup>1,2</sup>, Elizabeth Ambrosio<sup>1,5</sup>, Diana-P Danciu<sup>5</sup>, David A. Elliot<sup>2</sup>, Kiyoshi Naruse<sup>4</sup>, Anna Marciniak Czochra<sup>5</sup> & Lazaro Centanin<sup>1</sup>.

<sup>1</sup>Centre for Organismal Studies, Heidelberg University, 69120 Heidelberg, Germany

<sup>2</sup>Murdoch Children's Research Institute, Royal Children's Hospital, Parkville, VIC, 3052, Australia

<sup>3</sup>Institute of Applied Mathematics, Interdisciplinary Center for Scientific Computing (IWR) and BIOQUANT Center, Heidelberg University, 69120 Heidelberg, Germany

<sup>4</sup>Laboratory of Bioresources, National Institute for Basic Biology, National Institutes of Natural Sciences, Okazaki, Aichi 444-8585, Japan

<sup>5</sup>Current address: Danish Stem Cell Center (DanStem), University of Copenhagen, 2200 Copenhagen N, Denmark

## 1 **Abstract**

2 While lower vertebrates contain adult stem cells (aSCs) that maintain homeostasis and drive un-  
3 exhaustive organismal growth, mammalian aSCs display mainly the homeostatic function.  
4 Understanding aSC-driven growth is of paramount importance to promote organ regeneration and  
5 prevent tumor formation in mammals. Here we present a clonal approach to address common or  
6 dedicated populations of aSCs for homeostasis and growth. Our functional assays on medaka gills  
7 demonstrate the existence of separate homeostatic and growth aSCs, which are clonal but differ in  
8 their topology. While homeostatic aSCs are fixed, embedded in the tissue, growth aSCs locate at the  
9 expanding peripheral zone. Modifications in tissue architecture can convert the homeostatic zone  
10 into a growth zone, indicating a leading role for the physical niche defining stem cell output. We  
11 hypothesize that physical niches are main players to restrict aSCs to a homeostatic function in  
12 animals with a fixed adult size.

## 1 **Introduction**

2 Higher vertebrates acquire a definitive body size around the time of their sexual maturation.  
3 Although many adult stem cells (aSCs) remain active and keep producing new cells afterwards, they  
4 mainly replace cells that are lost on a daily basis. On the other hand, lower vertebrates like fish keep  
5 increasing their size even during adulthood due to the capacity of aSCs to drive growth in parallel  
6 to maintaining organ homeostasis. The basis for the different outputs between aSCs in lower and  
7 higher vertebrates is still not fully understood. It has been reported, however, that in pathological  
8 conditions mammalian aSCs exhibit the ability to drive growth, as best represented by cancer stem  
9 cells (CSCs) (Batlle & Clevers, 2017; Nassar & Blanpain, 2016; Clevers, 2011; Suvà *et al*, 2014;  
10 Quintana *et al*, 2008; Barker *et al*, 2009; Schepers *et al*, 2012; Boumahdi *et al*, 2014).

11 Since stem cells in fish maintain homeostasis and drive post-embryonic growth in a highly  
12 controlled manner, the system permits identifying similarities and differences in case both  
13 functions are performed by dedicated populations, or identifying conditions for homeostatic and  
14 growth outputs in case of a common stem cell. There are several genetic tools and techniques to  
15 explore aSCs in fish, and an abundant literature covering different aspects of their biology in various  
16 organs and also during regeneration paradigms (Gupta & Poss, 2012; Knopf *et al*, 2011; Tu &  
17 Johnson, 2011; Kizil *et al*, 2012; Kyritsis *et al*, 2012; Pan *et al*, 2013; Centanin *et al*, 2014; Jungke *et al*,  
18 2015; Henninger *et al*, 2017; Singh *et al*, 2017; McKenna *et al*, 2016; Aghaallaei *et al*, 2016).  
19 Despite all these major advances, we still do not understand whether the same pool of stem cells is  
20 responsible for driving both growth and homeostatic replacement, or if alternatively, each task is  
21 performed by dedicated aSCs.

22 We decided to address this question using the medaka gill, which works as a respiratory, sensory  
23 and osmoregulatory organ in most teleost fish. Gills are permanently exposed to circulating water  
24 and therefore have a high turnover rate (Chrétien & Pizam, 1986). Additionally, their growth pace  
25 must guarantee oxygen supply to meet the energetic demands of a growing organismal size. Moving  
26 from the highest-level structure to the smallest, gills are organised in four pairs of branchial arches,  
27 a number which remains constant through the fish's life. Each brachial arch consists of two rows of  
28 an ever-increasing number of filaments that are added life-long at both extremes (Figure 1A).  
29 Primary filaments have a core from which secondary filaments, or lamellae, protrude. The lamellae  
30 are the respiratory unit of the organ, and new lamellae are continually produced within each  
31 filament (Wilson & Laurent, 2002). Bigger fish therefore display more filaments that are longer than  
32 those of smaller fish, and there is a direct correlation of filament length and number and the body  
33 size of the fish (Wilson & Laurent, 2002).

1 Besides being the respiratory organ of fish, the gill has additional functions as a sensory and  
2 osmoregulatory organ (Sundin & Nilsson, 2002; Wilson & Laurent, 2002; Jonz & Nurse, 2005;  
3 Hockman *et al*, 2017). It contains oxygen sensing cells (Jonz *et al*, 2004), similar to those found in  
4 the mammalian carotid body although with a different lineage history (Hockman *et al*, 2017), and  
5 mitochondrial rich cells (MRCs) (Wilson & Laurent, 2002) that regulate ion uptake and excretion  
6 and are identified by a distinctive Na<sup>+</sup>, K<sup>+</sup>, ATPase activity. Other cell types include pavement cells  
7 (respiratory cells of the gills), pillar cells (structural support for lamellae), globe cells (mucous  
8 secretory cells), chondrocytes (skeleton of the filaments) and vascular cells. All these cell types must  
9 be permanently produced in a coordinated manner during the post-embryonic life of fish. The gill  
10 constitutes, therefore, an organ that allows addressing adult stem cells during the addition and  
11 homeostatic replacement of numerous, diverse cell types.

12 Bona fide stem cells can only be identified and characterised by following their offspring for long  
13 periods to prove self-renewal, the defining feature of stem cells (Clevers & Watt, 2018). In this  
14 study, we use a lineage analysis approach that revealed growth and homeostatic stem cells in the  
15 medaka gill. We found that gill stem cells are fate restricted, and identified at least four different  
16 lineages along each filament. By generating clones at different stages, we show that these four  
17 lineages are generated early in embryogenesis, previous to the formation of the gill. Our results also  
18 indicate that growth and homeostatic aSCs locate to different regions along the gill filaments and  
19 the branchial arches. Homeostatic stem cells have a fixed position embedded in the tissue, and  
20 generate cells that move away to be integrated in an already functional unit, similarly to mammalian  
21 aSCs in the intestinal crypt (Barker *et al*, 2008). Growth stem cells, on the other hand, locate to the  
22 growing edge of filaments and are moved as filaments grow, resembling the activity of plant growth  
23 stem cells at the apical meristems (Greb & Lohmann, 2016). We have also found that the  
24 homeostatic aSCs can turn into growth aSCs when the apical part of a filament is ablated, revealing  
25 that the activity of a stem cell is highly plastic and depends on the local environment. Our data  
26 reveal a topological difference between growth and homeostatic stem cells, that has similar  
27 functional consequences in diverse stem cell systems.

## 1 **Results**

### 2 **Medaka Gills Contain Homeostatic and Growth Stem Cells**

3 The fish gill displays a significant post-embryonic expansion that reflects the activity of growth  
4 stem cells and a fast turnover rate that indicates the presence of homeostatic cells. Gills massively  
5 increment their size during medaka post-embryonic life (Figure 1A, left), where growth happens  
6 along two orthogonal axes. One axis represents increase in length of each filament, and the other,  
7 the iterative addition of new filaments to a branchial arch. This way, branchial arches of an adult  
8 fish contain more filaments, which are also longer, than those of juveniles. Branchial arches in  
9 medaka continue to expand along these two axes well after sexual maturation (Figure 1B, C). Gills  
10 from teleost fish are exposed to the surrounding water and experience a fast turnover rate. When  
11 adult medaka are incubated with IdU for 48 h, their gill filaments display a strong signal from the  
12 base to the top (Figure 1D), which indicates the presence of mitotically active cells all along the  
13 filament's longitudinal axis. These observations position medaka gills as an ideal system to explore  
14 the presence of growth and homeostatic stem cells within the same organ and address their  
15 similarities and differences.

16

### 17 **Growth Stem Cells Locate to Both Growing Edges of Each Branchial Arch**

18 We first focussed on identifying growth stem cells, by combining experimental data on clonal  
19 progression with a mathematical approach to quantify the expected behavior for stem cell- and  
20 progenitor-mediated growth. Experimentally, clones were generated using the Gaudí toolkit, which  
21 consists of transgenic lines bearing floxed fluorescent reporter cassettes (Gaudí<sup>RSG</sup> or Gaudí<sup>BBW2.1</sup>)  
22 and allows inducing either the expression or the activity of the Cre recombinase (Gaudí<sup>Hsp70A.CRE</sup> or  
23 Gaudí<sup>Ubiq.iCRE</sup>, respectively). The Gaudí toolkit has already been extensively used for lineage analyses  
24 in medaka (Centanin *et al*, 2014; Reinhardt *et al*, 2015; Lust *et al*, 2016; Aghaallaei *et al*, 2016; Seleit  
25 *et al*, 2017). Clones are generated by applying subtle heat-shock treatments (when Gaudí<sup>Hsp70A.CRE</sup> is  
26 used) or low doses of tamoxifen (when Gaudí<sup>Ubiq.iCRE</sup> is used) to double transgenic animals, which  
27 results in a sparse labelling of different cells along the fish body, transmitting the label to their  
28 offspring.

29 The length of filaments increases from peripheral to central positions (Figure 1A, 2A), regardless of  
30 the total number of filaments per branchial arch (Leguen, 2017). This particular arrangement

1 suggests that the oldest and therefore longest filaments, of embryonic origin, locate to the centre  
2 of a branchial arch, while the new filaments are incorporated at the peripheral extremes either by  
3 stem cells (permanent) or progenitors (exhaustive). Conceptually, the latter two scenarios would  
4 lead to different lineage outputs. If filaments were formed from progenitor cells that are already  
5 present at the time of labelling, we would anticipate that the post-embryonic - peripheral - domain  
6 of adult branchial arches should contain both labelled and unlabelled filaments (Figure 2A, bottom  
7 left). Alternatively, if post-embryonic filaments were generated by a *bona fide*, self-renewing stem  
8 cells, the periphery of adult branchial arches should be homogeneous in its labelling status,  
9 containing either labelled or non-labelled stretches of clonal filaments (Figure 2A, bottom right).  
10 When we analysed adult Gaudi<sup>Ubiq.iCRE</sup> Gaudi<sup>RSG</sup> transgenic fish that had been induced for sparse  
11 recombination at old embryonic stages (9 dpf.), we observed that post-embryonic filaments at  
12 the extreme of branchial arches were grouped in either labelled or non-labelled stretches (Figure  
13 2B, C, asterisks for labelled stretches and arrowheads for embryonic filaments) suggesting that they  
14 were generated by bona-fide stem cells.

15 Our experimental data were then compared to the outcome of a computational model accounting  
16 for different scenarios for progenitor and stem cell mediated growth. The analysis was focussed on  
17 the six most peripheral filaments of adult branchial arches (See M&M for details on filament  
18 numbers and how labelling efficiency was calculated). For each scenario, we employed stochastic  
19 simulations assigning "0" to a non-labelled filament and "1" to a labelled filament and computing  
20 the number of switches in the labelled status of two consecutive filaments, i.e. the number of  
21 transitions from "0-to-1" and from "1-to-0" (Supplementary Tables 1 and 2) (1,000 simulations on  
22 5,000 randomly generated stretches for each experimental gill analysed, see M&M). Assuming a  
23 labelling efficiency of 50%, a progenitor-based model results in a normal distribution of switches  
24 while a stem-cell-based model shows no switches among consecutive filaments, i.e. contains only  
25 filaments that have a value of either 0 or 1 (see Figure 2D for the number of switches for each model  
26 with labelling efficiencies estimated from experiments). We have quantified both peripheral  
27 extremes of hundreds of experimental branchial arches (N >300 6-filament stretches, N=22  
28 independent gills) (Supplementary Table 3) and compared each individual branchial arch to the  
29 simulation results of the two models. For every gill analysed, the *stem cell* model explained the  
30 experimental data better than the *progenitor cell* model (Supplementary Table 4). Altogether, our  
31 data revealed the existence of growth stem cells at the peripheral extremes of branchial arches,  
32 which generate new filaments during the post-embryonic life in medaka.

33

## 1 **Growth Stem Cells Locate to the Growing Edge of Each Filament**

2 The massive post-embryonic growth of teleost gills occurs by increasing the number but also the  
3 length of filaments. Previous data on stationary samples suggest that filaments grow from their tip  
4 (Morgan, 1974), and we followed two complementary dynamic approaches to characterise stem cells  
5 during filament growth. First, we exploited the high rate of cellular turnover previously observed by  
6 a pulse of IdU (Figure 1D) which labels mitotic cells all along the filament. We reasoned that during  
7 a chase period, cells that divide repeatedly – as expected for stem cells driving growth – would  
8 dilute their IdU content with every cell division, as previously reported for other fish tissues  
9 (Centanin *et al*, 2011). Therefore, the chase period reveals a region in the filament with a decreased  
10 signal for IdU that may in turn indicate where new cells are being added (Figure 3A illustrates the  
11 different scenarios). Indeed, all filaments analysed contained a region deprived of IdU at the most  
12 distal tip (Figure 3B), what stays in agreement with the previous assumptions. Complementary, we  
13 performed a clonal analysis by inducing sparse recombination using Gaudí transgenic fish. To reveal  
14 the localisation of growing clones, Gaudí<sup>Ubiq.iCRE</sup> Gaudí<sup>RSG</sup> fish were induced for recombination at 3  
15 weeks post fertilisation and grown for 2 months after tamoxifen treatment. We observed that clones  
16 at the proximal and middle part of the filament were small and restricted to one lamellae, while the  
17 clones at the distal part contained hundreds of cells suggesting that they were generated by growth  
18 stem cells (Figure 3C, D).

19 Analysis of pulse-chase IdU experiments in entire branchial arches also suggested that the fraction  
20 of IdU labelled cells decreased from central to peripheral filaments. While the most central  
21 filaments contain IdU positive cells in roughly 80% of their length, filaments close to the periphery  
22 contain just few IdU cells at the basal part or even no IdU cell at all, indicating that they were  
23 produced after IdU administration. Macroscopically, IdU label had a shape of a smaller-sized  
24 branchial arch nested within a non-labelled, bigger branchial arch (Figure 3E, F). Interestingly,  
25 while we observed that the central filaments showed a longer basal signal that becomes shorter in  
26 more peripheral filaments, the upper non-labelled fraction seemed rather stable along central-to-  
27 periphery axis of the branchial arch (Figure 3F). This suggested that individual filaments had grown  
28 at comparable rates during the chase phase, highlighting a coordination among the stem cells that  
29 sustained length growth in each filament. Taken together, IdU experiments revealed growth of  
30 filaments starting from their most distal extreme, and clonal analysis indicated location of the  
31 growth stem cells at the growing tip of each filament.

32

## 1 **Growth Stem Cells are Fate Restricted**

2 Gill filaments contain different cell types distributed along their longitudinal axis (Laurent, 1984;  
3 Sundin & Nilsson, 2002; Wilson & Laurent, 2002). Having revealed growth stem cells at the tip of  
4 each filament, we explored whether different cell types had a dedicated or a common stem cell  
5 during post-embryonic growth. Previous experiments in zebrafish on labelling cell populations at  
6 early embryonic stages revealed that neuro-endocrine cells (NECs) are derived from the endoderm  
7 (Hockman *et al*, 2017), while pillar cells have a neural crest origin (Mongera *et al*, 2013). We followed  
8 a holistic approach to address the potency of gill stem cells once the organ is formed, by using  
9 inducible ubiquitous drivers to potentially label all possible lineages within a gill filament. We  
10 induced sparse recombination at 8 dpf. in Gaudi<sup>Ubiq.iCRE</sup> Gaudi<sup>RSG</sup> double transgenic fish and grew  
11 them to adulthood. We selected gills with EGFP positive clones (Figure 4A), and imaged branchial  
12 arches and gill filaments with cellular resolution (Figure 4B-F). Our analysis revealed the presence  
13 of four different recombination patterns illustrating the lineage of different types of growth stem  
14 cells (Figure 4C-F, patterns 1 to 4). Moreover, this lineage analysis approach showed that growth  
15 stem cells at the tip of gill filaments are indeed fate restricted, and hence, the most apical domain  
16 of a filament hosts different growth stem cells with complementary potential.

17 Noticeable, recombined filaments displayed the same lineage patterns spanning from their base,  
18 i.e. juvenile domain, to their tip, i.e. adult domain, (Figure 4C-F) (N > 200 recombined filaments)  
19 indicating that growth stem cells maintain both their activity and their potency during a life-time.  
20 A detailed description of the different cell types included in each lineage largely exceeds the scope  
21 of this study. Broadly speaking, labelled cells in pattern 1 (Figure 4 C, G-H) are epithelial cells  
22 covering the lamellae and the interlamellar space, including MRC cells as revealed by expression of  
23 the Na<sup>+</sup>/K<sup>+</sup> ATPase (Figure 4H). Pattern 3 and 4 display a reduced number of labelled cells, sparsely  
24 distributed along the filament (pattern 3) or surrounding the gill ray (pattern 4) (Supplementary  
25 Movies 1 and 2, respectively). Pattern 2 consists of labelled pillar cells and chondrocytes of the gill  
26 ray (Figure 4 I, I', and reconstructions in Supplementary Movie 3), both easily distinguishable by  
27 their location and unique nuclear morphology. Both cell types were previously reported as neural  
28 crest derivatives (Mongera *et al*, 2013), and our results demonstrate that they are produced by a  
29 common stem cell in every filament during the post-embryonic growth of medaka.

30 We revealed in the previous sections that growth stem cells at the periphery of branchial arches (*br-*  
31 *archSCs*) generate new filaments, and we showed that each filament contains, in turn, growth stem  
32 cells (*filamSCs*) of different fates. To address whether the fate of *filamSCs* is acquired when filaments  
33 are formed or set up already in *br-archSCs* and maintained life-long, we exploited the stretches of



1 labelled — and therefore clonal — filaments observed at the periphery of branchial arches in adult  
2 Gaudi<sup>RSG</sup> Gaudi<sup>Ubi.iCRE</sup> fish induced for recombination during embryogenesis (Figure 2B, 4A, B). We  
3 reasoned that if a labelled *br-archSC* is fate restricted, the consecutive filaments formed from it  
4 should display an identical recombination pattern, since *filamSCs* would have inherited the same  
5 fate-restriction from their common *br-archSC*. Alternatively, if *filamSCs* would acquire the fate-  
6 restriction when each filament is formed, then a stretch of clonal filaments should display different  
7 recombination patterns, based on the independent fate acquisition at the onset of filament  
8 formation (schemes in Figure 5A). We have focussed on 153 branchial arch extremes that started  
9 with a labelled filament (N= 83 for *rec. pattern 1*, N= 44 for *rec. pattern 2*, N= 22 for *rec. pattern 3* and  
10 N= 4 for *rec. pattern 4*), and 97.4% were followed by a filament with the same recombination pattern  
11 (Supplementary Table 4). Moreover, 81.7% of stretches maintained the same recombination pattern  
12 for 6 or more filaments, indicating that the labelled cell-of-origin for post-embryonic filaments was  
13 already fate restricted. Altogether, our data revealed that a branchial arch contains fate restricted  
14 growth *br-archSCs* at its peripheral extremes that produce growth *filamSCs* stem cells with the same  
15 fate-restriction.

16

## 17 **Homeostatic Stem Cells Locate to the Base of Each Lamella**

18 Branchial arches grow during post-embryonic life by adding more filaments (Figure 1A-C), and  
19 filaments grow in length by adding more lamellae (Figure 1A, Figure 6A). Noticeable, the length of  
20 consecutive lamellae does not increase with time along a filament (Figure 6B), resulting in basal  
21 and apical lamellae having comparable sizes (basal: 35,72±/-1,93  $\mu$ m and apical: 34,38±/-4,04  $\mu$ m  
22 N=6 lamellae of each). This also holds true when comparing the length of lamellae from long  
23 (central, embryonic) and short (peripheral, post-embryonic) filaments, and comparing lamellae  
24 from medaka of different body length. Lamellae therefore maintain their size despite containing  
25 proliferative cells (Laurent, 1984; Laurent *et al*, 1994), a scenario that resembles most mammalian  
26 stem cell systems in adults, such as the intestinal crypt or the hair follicle. Previous studies have  
27 reported mitotic figures along the filament core in histological sections of various teleost fish. To  
28 address the presence and location of proliferating cells in the lamellae of medaka, we performed  
29 shorter IdU pulses (12h) and observed that most lamellae contained positive cells at the proximal  
30 extreme (Figure 6C), adjacent to the central blood vessels and the gill ray.

31 We next performed a lineage analysis of gill stem cells during homeostasis, focussing on the  
32 lamellae since they constitute naturally-occurring physical compartments that facilitate the

1 analysis of clonal progression. We used double transgenic Gaudí<sup>Ubiq.iCre</sup> Gaudí<sup>RSG</sup> adults that were  
2 grown for 3 additional weeks after clonal labelling, and focussed on those containing only a few  
3 recombined lamellae per branchial arch (labelling efficiency less than 0.5%). A detailed analysis on  
4 lamellae located far away from the filaments' growing tip revealed clones of labelled cells spanning  
5 from the proximal to the distal extreme of the lamella (Figure 6D, E). The clones ranged from a few  
6 pillar cells (Figure 6D, D') to most pillar cells in the lamella (Figure D'', E and Supplementary Movie  
7 4). This dataset reflects the activity of stem cells contributing to a structure that does not increase  
8 in size but renews the cells within — i.e., homeostatic stem cells. Our results therefore indicate the  
9 presence of homeostatic pillar stem cells at the base of each lamella in medaka gills.

10

## 11 **The Homeostatic Domain Can Restore Filament Growth**

12 Our lineage analysis revealed distinct locations for both growth and homeostatic stem cells along  
13 gill filaments. The growth domain of filaments is always at the top, while the homeostatic domain  
14 extends along the longitudinal axis (Figure 7A). Our lineage analysis also revealed that growth and  
15 homeostatic stem cells are clonal, since all homeostatic stem cells within a lineage are labelled  
16 when a filament has the corresponding labelled growth *filamSC* (Figure 4C-F). We then wondered  
17 about their different behaviour; while growth stem cells are displaced by the progeny they generate,  
18 homeostatic stem cells maintain their position while pushing their progeny away. These different  
19 locations along the filament might constitute dissimilar physical niches. It has indeed been shown  
20 in other teleost fish that the growing edge where growth stem cells host is subjected to less spatial  
21 restriction than the gill ray niche {Morgan:1974fi}. On the other hand, there is a strong extra-  
22 cellular matrix rich in collagen and secreted mainly by chondrocytes and early pillar cells across the  
23 filament {Morgan:1974fi}, adjacent to the place in which we characterized homeostatic stem cells.

24 We speculated that modifying the close environment of homeostatic stem cells by ablating the  
25 growing zone of a filament could elicit a growth response from the homeostatic domain. We  
26 therefore ablated filaments by physically removing their upper region, where the growing domain  
27 and part of the homeostatic domain are located (Figure 7A). When experimental fish were grown  
28 for a month after ablation, we could still recognise the ablated filaments due to their shorter length,  
29 compared to that of their neighbour, non-ablated filaments (Figure 7B). Ablated filaments,  
30 however, restored the characteristic morphology of a growth domain at their most upper extreme  
31 (Figure 7C, D). Additionally, BrdU incorporation showed that the *new* growth domains were  
32 proliferative, showing a similar BrdU label than non-ablated filaments in the same branchial arch

1 (Figure 7E-G). Our lineage analysis during homeostatic growth in medaka revealed different growth  
2 and homeostatic stem cells in each filament that maintained their fate during the entire life of the  
3 fish. We therefore wanted to assess whether the reconstitution of a filament growth domain after  
4 injury required cells from all different lineages or if alternatively, cells from a given lineage would  
5 change their fate to contribute to multiple recombination patterns (Figure 4 C-F). Injury paradigms  
6 have been shown to affect the fate commitment of stem cells in different models (Van Keymeulen  
7 *et al*, 2011; Suetsugu-Maki *et al*, 2012) while in others, proliferative cells maintain their fate during  
8 the regeneration process (Kragl *et al*, 2009; Knopf *et al*, 2011).

9 To address the nature of the cells re-establishing the growth domain, the same injury assay was  
10 performed on Gaudí<sup>Ubiq.iCRE</sup> Gaudí<sup>RSG</sup> transgenic fish that had been induced for sparse recombination  
11 at late embryonic stage (8 dpf) and grown for two months. When we analysed these samples 3 weeks  
12 after injury, we observed that the recombination pattern of the basal, non-injured region was  
13 identical to the recombination pattern of the newly generated zone (Figure 7F-I) (N=30 filaments  
14 in 6 branchial arches, N=17 for pattern 1, N=11 for pattern 2, N=2 for pattern 3). These results  
15 indicate that the re-established growth zone is formed by an ensemble of cells from the different  
16 lineages, and strongly suggest that homeostatic stem cells within all lineages can be converted to  
17 growth stem cells during regeneration. Our data definitively reveal that filaments possess the ability  
18 to resume growth from the homeostatic domain in a process that require cells from the different  
19 lineages. Overall, we propose from our observations that the different niches – physical and/or  
20 molecular - along the filament could operate as main regulators of the homeostatic-or-growth  
21 activity for stem cells in the fish gill.

## 1 Discussion

2 In this study, we use mathematical modelling and genetic lineage analysis to reveal the rationale  
3 behind the permanent post-embryonic growth in a vertebrate. We introduce the fish gill, and  
4 particularly branchial arches, as a new model system that displays an exquisite temporal/spatial  
5 organisation, and use it to characterise growth and homeostatic stem cells. We reveal two domains  
6 harbouring growth stem cells: both extremes of each branchial arch contain *br-archSCs*, which in  
7 turn generate *filamSCs* that locate to the tip of newly formed filaments. Additionally, *filamSCs*  
8 generate homeostatic stem cells at the lamellae along the longitudinal axis of the filament. The  
9 peripheral-to-central axis of branchial arches reflects a young-to-old filament order, and the  
10 longitudinal axis of a filament reflects a young-to-old lamellae order. The two growth stem cells  
11 and the one homeostatic stem cell types are clonal and organised in a hierarchical manner.

12 Our observations indicate that the relative position within the organ has a major impact on the  
13 growth vs homeostatic activity of stem cells. We have found that when the growth domain of a  
14 filament is lost, the homeostatic domain is able to generate a new, functional growth domain. This  
15 observation suggests that physical or molecular modifications in the local environment (relaxation  
16 of the inner core, or the absence of a repressive signal, respectively) could convert homeostatic stem  
17 cells into growth stem cells. In the absence of specific markers to label homeostatic stem cells before  
18 the ablation, however, we cannot discard the presence of quiescent stem cells that get activated  
19 after injury, nor the possibility of injury-triggered trans-differentiation as shown in the zebrafish  
20 caudal fin (Knopf *et al*, 2011).

21 Permanent post-embryonic growth is a challenging feature for an organism since new cells have to  
22 be incorporated to a functional organ without affecting its physiological activity. Restricting growth  
23 stem cells to the growing edge is an effective way to compartmentalise cell addition and organ  
24 function. Strikingly, the location of growth stem cells in gill filaments is highly reminiscent of the  
25 overall topology of meristems in plants (Greb & Lohmann, 2016). In both systems, axis extension  
26 occurs by the sustained activity of stem cells that locate to the growing edge. These stem cells  
27 consistently remain at the growing zone, while their progeny start differentiation programs and  
28 occupy a final location at the coordinates in which they were born. It is to note that other ever-  
29 growing organs in fish follow the same growing principle, with tissue stem cells located at the  
30 growing edge and differentiated progeny left behind, as it has been nicely shown for different cell  
31 types in the zebrafish caudal fin (Tu & Johnson, 2011) and the medaka neural retina and retinal  
32 epithelium (Centanin *et al*, 2011; 2014). Since stem cells are thought to have evolved independently

1 in the vegetal and the animal lineages (Meyerowitz, 2002; Scheres, 2007), our results illustrate how  
2 the same rationale to sustain permanent growth can be adopted in the most diverse systems.

3 We have performed an organ-scale lineage analysis at cellular resolution and found that growth  
4 stem cells and homeostatic stem cells are fate restricted. We used two un-biased labelling  
5 approaches (ubiquitous expression of the inducible *ErT2CRE* and heat-shock induced expression of  
6 *CRE*) to identify at least four different fate-restrictions for gill stem cells, which generate  
7 reproducible labelling patterns along gill filaments. Since each filament contains all four fate  
8 restricted stem cells (we have not observed filaments lacking one entire lineage), our results  
9 determine that the growth zone of a gill filament is indeed an *ensemble* – a group of stem cells with  
10 different potencies that work in an interconnected manner. Two relevant avenues open from this  
11 analysis, namely: a) how stem cells are recruited together to a newly forming filament, a process  
12 that happens hundreds of times during the lifetime of a medaka fish and thousands of times in  
13 longer-lived teleost fish, and b) how stem cells coordinate their activity to maintain the ratio of cell  
14 types in the individual filaments. We have observed that the relative proportion of differentiated  
15 cells types is maintained along the filament axis, which once again points at a coordinated pace of  
16 cell type generation that is maintained life-long. One fundamental aspect to start addressing  
17 coordination is to define the number of stem cells for each lineage, a parameter that proved to be  
18 hard to estimate for most vertebrate organs. The prediction for gill filaments is that they contained  
19 a very reduced number of stem cells, for they generate all-or-none labelled filaments of a given cell  
20 type reflecting a clonal nature. Altogether, we believe that our results position the fish gill as an  
21 ideal system to quantitatively explore a stem cell niche hosting multiple lineage-restricted stem  
22 cells.

23 In most adult mammalian organs, stem cells maintain homeostasis by generating new cells that will  
24 replace those lost during physiological or pathological conditions. We have functionally identified  
25 homeostatic stem cells in the fish gill, and focussed on the ones generating pillar cells. Our lineage  
26 analysis demonstrates that growth and homeostatic stem cells are clonal along a filament, where  
27 the former generate the latter. The most obvious difference between these two stem cell types is  
28 their relative position; growth stem cells are located at the growing tip, beyond the rigid core that  
29 physically sustains the structure of the filament, while homeostatic stem cells are embedded inside  
30 the tissue, adjacent to the collagen-rich chondrocyte column. It is to note that both the function  
31 and the relative location of the gill homeostatic stem cells match those of the mammalian  
32 homeostatic stem cells, being located at a fixed position and displacing their progeny far away - as  
33 it is observed for intestinal stem cells, skin stem cells and oesophagus stem cells (Barker *et al*, 2008;

1 Blanpain & Fuchs, 2009; Seery, 2002). The comparison of growth and homeostatic stem cells in the  
2 gill suggests the existence of a physical niche that would restrict stem cells to their homeostatic  
3 role, preventing them to drive growth. We believe that during vertebrate evolution, the transition  
4 from lower (ever-growing) to higher (size-fixed) vertebrates involved restraining the growth activity  
5 of adult stem cells. One of the main functions of mammalian physical niches, in this view, would be  
6 to restrict stem cells to their homeostatic function. Many stem cell-related pathological conditions  
7 in mammals involve changes in the microenvironment including physical aspects of the niche  
8 (Brabletz *et al*, 2001; Vermeulen *et al*, 2010; Ye *et al*, 2015; Oskarsson *et al*, 2011; Liu *et al*, 2012;  
9 Butcher *et al*, 2009), suggesting that homeostatic stem cells could drive growth in that context.  
10 Along the same line, the extensive work using organoids that are generated from adult homeostatic  
11 stem cells, like intestinal stem cells, (Sato *et al*, 2009; Kretzschmar & Clevers, 2016), demonstrates  
12 that healthy aSCs have indeed the capacity to drive growth under experimental conditions and when  
13 removed from their physiological niche. Our work, therefore, illustrates how different niches affect  
14 the functional output of clonal stem cells driving growth and homeostatic replacement in an intact  
15 *in vivo* model.

## 1 **Material & Methods**

### 2 **Fish Stocks**

3 Wild type and transgenic *Oryzias latipes* (medaka) stocks were maintained in a fish facility built  
4 according to the local animal welfare standards (Tierschutzgesetz §11, Abs. 1, Nr. 1). Animal  
5 handling and was performed in accordance with European Union animal welfare guidelines and with  
6 the approval from the Institutional Animal Care and Use Committees of the National Institute for  
7 Basic Biology, Japan. The Heidelberg facility is under the supervision of the local representative of  
8 the animal welfare agency. Fish were maintained in a constant recirculating system at 28°C with a  
9 14 h light/10 h dark cycle (Tierschutzgesetz 111, Abs. 1, Nr. 1, Haltungserlaubnis AZ35–9185.64 and  
10 AZ35–9185.64/BH KIT). The wild type strain used in this study is Cab, a medaka Southern  
11 population strain. We used the following transgenic lines that belong to the Gaudí living toolkit  
12 (Centanin *et al*, 2014): Gaudí<sup>Ubiq.iCre</sup>, Gaudí<sup>Hsp70.A</sup>, Gaudí<sup>loxP.OUT</sup> and Gaudí<sup>RSG</sup>.

13

### 14 **Generation of clones**

15 Clones were generated as previously described (Centanin *et al*, 2014; 2011; Seleit *et al*, 2017;  
16 Rembold *et al*, 2006). A brief explanation follows for the different induction protocols. Fish that  
17 displayed high recombination were discarded for quantifications on lineage analysis and fate  
18 restriction to ensure clonality.

19 Inducing recombination via heat-shock: double transgenic Gaudí<sup>RSG</sup>, Gaudí<sup>Hsp70.A</sup> embryos (stage 32  
20 to stage 37) were heat-shocked using ERM at 42°C and transferred to 37°C for 1 to 3h.

21 Inducing recombination via tamoxifen: double transgenic Gaudí<sup>RSG</sup>, Gaudí<sup>Ubiq.iCre</sup> fish (stage 36 to  
22 early juveniles) were placed in a 5µM Tamoxifen (T5648 Sigma) solution in ERM for 3 hours (short  
23 treatment) or 16 hours (long treatment), and rinsed in abundant fresh ERM before returning them  
24 to the plate. Adult fish were placed in a 1µM Tamoxifen solution in fish water for 4 hours, and  
25 washed extensively before returning them to the tank.

26 Generating clones via blastula transplantation: between 25 - 40 cells were transplanted from a  
27 Gaudí<sup>loxP.OUT</sup> heterozygous to a wild type, unlabelled blastula. Transplanted embryos were kept in  
28 1xERM supplemented with Penicillin-Streptomycin (Sigma, P0781, used 1/200) and screened for  
29 EGFP+ cells in the gills during late embryogenesis.

30

31

## 1 **Antibodies and staining protocol**

2 For immunofluorescence stainings we used previously described protocols (Centanin et al., 2014).  
3 Primary antibodies used in this study were Rabbit a-GFP, Chicken a-GFP (Invitrogen, both 1/750),  
4 Rabbit a-Na<sup>+</sup>K<sup>+</sup>ATP-ase (Abcam ab76020, EP1845Y, 1/200) and mouse a-BrdU/IdU (Becton  
5 Dickinson, 1/50). Secondary antibodies were Alexa 488 a-Rabbit, Alexa Alexa 647 a-Rabbit, Alexa  
6 488 a-Chicken (Invitrogen, all 1/500) and Cy5 a-mouse (Jackson, 1/500). DAPI was used in a final  
7 concentration of 5ug/l.

8 To stain gills, adult fish were sacrificed using a 2 mg/ml Tricaine solution (Sigma-Aldrich, A5040-  
9 25G) and fixed in 4% PFA/PTW for at least 2 hours. Entire Gills were enucleated and fixed overnight  
10 in 4% PFA/PTW at 4C, washed extensively with PTW and permeabilised using acetone (10-15  
11 minutes at -20C). Staining was performed either on entire gills or on separated branchial arches.  
12 After staining, samples were transferred to Glycerol 50% and mounted between cover slides using a  
13 minimal spacer.

14

## 15 **BrdU or IdU treatment**

16 Stage 41 juveniles were placed in a 0,4mg/ml BrdU or IdU solution (B5002 and I7125 respectively,  
17 Sigma) in ERM for 16 hours and rinsed in abundant fresh ERM before transferring to a tank. Adult  
18 fish were placed in a in a 0,4mg/ml BrdU or IdU solution in fish water for 24 or 48 hours, and washed  
19 extensively before returning them to the tank.

20

## 21 **Imaging**

22 Big samples like entire gills or whole branchial arches were imaged under a fluorescent binocular  
23 (Olympus MVX10) coupled to a Leica DFC500 camera, or using a Nikon AZ100 scope coupled to a  
24 Nikon C1 confocal. Filaments were imaged mostly using confocal Leica TCS SPE, Leica TCS SP8 and  
25 Leica TCS SP5 II microscopes. When entire branchial arches were imaged with confocal  
26 microscopes, we use the Tile function of a Leica TCS SP8 or a Nikon C2. All image analysis was  
27 performed using standard Fiji software.

28

## 29 **Modelling**

30 To model progenitor and stem cell scenarios for the addition of post-embryonic filaments we  
31 performed stochastic simulations for each considering a stretch of 6 filaments, and then compared  
32 them to experimental data. We chose stretches of 6 filaments because those guaranteed that we



1 would be focussing on the post-embryonic domain of a branchial arch. A random filament would  
2 contain ca. 8 embryonic filaments, and we considered branchial arches with 20 or more filaments,  
3 which results in 6 post-embryonic filaments at each side.

4 Stem cell model: if there is only one stem cell in the niche, then all 6 filaments will share the same  
5 label, either 0 or 1. We draw random numbers from a Bernoulli distribution, where the probability  
6 parameter equals the experimental labelling efficiency of our dataset.

7 Progenitor model: in a similar manner, we considered the case of having 6 progenitor cells in the  
8 niche. Thus, this time a Bernoulli process of 6 trials with probability parameter equal to the labeling  
9 efficiency of the gill was simulated for each branchial arch.

10 Experimental data: We collected data from 22 Gaudi<sup>Ubiq.iCRE</sup> Gaudi<sup>RSG</sup> recombined gills, which we  
11 dissected and analysed under a confocal microscope and or macroscope - 8 to 16 branchial arches  
12 per gill. Subsequently, quantifications were done on the 6 most peripheral filaments from each side  
13 of a branchial arch. The labelling efficiency was estimated for each gill by employing a combinatorial  
14 approach: the number of labeled filaments at position +6 (i.e. oldest filaments selected) divided by  
15 the total number of branchial arches analysed for that gill.

16 Comparison: To compare each model to the experimental data, we compute an objective function  
17 in the form of a sum of square differences for each gill and each model. The smaller this objective  
18 function is, the better the fit between experimental data and simulations. We annotated both the  
19 number of switches and of labelled filaments in each branchial arch.

20 There exist 19 possible pairs  $(s,f)$  of switches and labelled filaments, ranging from  $(0,0)$ ,  $(0,6)$  up to  
21  $(5,3)$ . We calculated for each pair  $i$ , of the form  $(s,f)$  the frequency of observing it in the data from  
22 each gill  $j$ ,  $fD_i^{(j)}$ , and in simulations of 5000 filament stretches per gill  $j$ ,  $fS_i^{(j)}$ . The objective  
23 function  $f^{(j)}$  was computed for each gill as an adjusted sum of square differences:

$$24 \quad f^{(j)} = \frac{\sum_{i=1}^{19} (fD_i^{(j)} - fS_i^{(j)})^2}{19} \cdot 10^4$$

25 This was done for both the stem cell and the progenitors models. The factor  $10^4$  was introduced for  
26 avoiding small numbers thus facilitating the comparison between results. The procedure was  
27 repeated 1000 times, producing 1000 objective functions per gill and per model, and therefore  
28 obtaining an average value and a standard deviation for each gill for each model.

## 1 **Acknowledgements**

2 We thank S. Lemke, J. Wittbrodt, J. Lohmann and G. Begeman for scientific inputs at earlier versions  
3 of this project, and A. Seleit, K. Gross and I. Krämer for active discussions and suggestions on the  
4 manuscript. We are grateful to U. Engel and the Nikon Imaging Center for advice and support with  
5 microscopes and imaging, and to E Leist, A Sarraceno and M Majewski for fish maintenance. This  
6 work has been funded by the Deutsche Forschungsgemeinschaft (German Research Foundation,  
7 DFG) via the Collaborative Research Centre SFB873 (subproject A11 to LC and B08 to AMC). JS is  
8 the recipient of a Melbourne Research Scholarship from the University of Melbourne, Australia.

## 1 **Author Contributions**

2 JS & EMA conducted most experiments, analysed the data and edited the manuscript, D-PD & AMC  
3 run mathematical simulations and models and analysed *in silico* and experimental data, DAE  
4 provided support and hosted JS, KN performed experiments and provided reagents, LC conceived  
5 the project, performed experiments, analysed the data and wrote the manuscript with support from  
6 JS, EMA, D-PD & AMC.

1 **Conflict of interest**

2 The authors declare that they have no conflict of interest.

## 1 **References**

- 2 Aghaallaei N, Gruhl F, Schaefer CQ, Wernet T, Weinhardt V, Centanin L, Loosli F, Baumbach T &  
3 Wittbrodt J (2016) Identification, visualization and clonal analysis of intestinal stem cells in  
4 fish. *Development* **143**: 3470–3480
- 5 Barker N, Ridgway RA, van Es JH, van de Wetering M, Begthel H, van den Born M, Danenberg E,  
6 Clarke AR, Sansom OJ & Clevers H (2009) Crypt stem cells as the cells-of-origin of intestinal  
7 cancer. *Nature* **457**: 608–611
- 8 Barker N, van de Wetering M & Clevers H (2008) The intestinal stem cell. *Genes Dev.* **22**: 1856–  
9 1864
- 10 Batlle E & Clevers H (2017) Cancer stem cells revisited. *Nat. Med.* **23**: 1124–1134
- 11 Blanpain C & Fuchs E (2009) Epidermal homeostasis: a balancing act of stem cells in the skin. *Nat.*  
12 *Rev. Mol. Cell Biol.* **10**: 207–217
- 13 Boumahdi S, Driessens G, Lapouge G, Rorive S, Nassar D, Le Mercier M, Delatte B, Caauwe A,  
14 Lenglez S, Nkusi E, Brohée S, Salmon I, Dubois C, del Marmol V, Fuks F, Beck B & Blanpain C  
15 (2014) SOX2 controls tumour initiation and cancer stem-cell functions in squamous-cell  
16 carcinoma. *Nature* **511**: 246–250
- 17 Brabletz T, Jung A, Reu S, Porzner M, Hlubek F, Kunz-Schughart LA, Knuechel R & Kirchner T  
18 (2001) Variable beta-catenin expression in colorectal cancers indicates tumor progression  
19 driven by the tumor environment. *Proc. Natl. Acad. Sci. U.S.A.* **98**: 10356–10361
- 20 Butcher DT, Alliston T & Weaver VM (2009) A tense situation: forcing tumour progression. *Nat.*  
21 *Rev. Cancer* **9**: 108–122
- 22 Centanin L, Ander J-J, Hoeckendorf B, Lust K, Kellner T, Kraemer I, Urbany C, Hasel E, Harris WA,  
23 Simons BD & Wittbrodt J (2014) Exclusive multipotency and preferential asymmetric divisions  
24 in post-embryonic neural stem cells of the fish retina. *Development* **141**: 3472–3482
- 25 Centanin L, Hoeckendorf B & Wittbrodt J (2011) Fate restriction and multipotency in retinal stem  
26 cells. *Cell Stem Cell* **9**: 553–562
- 27 Chrétien M & Pissam M (1986) Cell renewal and differentiation in the gill epithelium of fresh- or  
28 salt-water-adapted euryhaline fish as revealed by [3H]-thymidine radioautography [*Lebistes*  
29 *reticulatus*]. *Biology of the cell* **56**: 137–150
- 30 Clevers H (2011) The cancer stem cell: premises, promises and challenges. *Nat. Med.* **17**: 313–319
- 31 Clevers H & Watt FM (2018) Defining Adult Stem Cells by Function, Not by Phenotype. *Annu. Rev.*  
32 *Biochem.* **87**: annurev-biochem-062917-012341
- 33 Greb T & Lohmann JU (2016) Plant Stem Cells. *Curr. Biol.* **26**: R816–21
- 34 Gupta V & Poss KD (2012) Clonally dominant cardiomyocytes direct heart morphogenesis. *Nature*  
35 **484**: 479–484
- 36 Henninger J, Santoso B, Hans S, Durand E, Moore J, Mosimann C, Brand M, Traver D & Zon L  
37 (2017) Clonal fate mapping quantifies the number of haematopoietic stem cells that arise

- 1 during development. *Nat. Cell Biol.* **19**: 17–27
- 2 Hockman D, Burns AJ, Schlosser G, Gates KP, Jevans B, Mongera A, Fisher S, Unlu G, Knapik EW,  
3 Kaufman CK, Mosimann C, Zon LI, Lancman JJ, Dong PDS, Lickert H, Tucker AS & Baker CVH  
4 (2017) Evolution of the hypoxia-sensitive cells involved in amniote respiratory reflexes. *Elife*  
5 **6**: 1024
- 6 Jonz MG & Nurse CA (2005) Development of oxygen sensing in the gills of zebrafish. *J. Exp. Biol.*  
7 **208**: 1537–1549
- 8 Jonz MG, Fearon IM & Nurse CA (2004) Neuroepithelial oxygen chemoreceptors of the zebrafish  
9 gill. *J. Physiol. (Lond.)* **560**: 737–752
- 10 Jungke P, Hammer J, Hans S & Brand M (2015) Isolation of Novel CreERT2-Driver Lines in  
11 Zebrafish Using an Unbiased Gene Trap Approach. *PLOS ONE* **10**: e0129072
- 12 Kizil C, Kyritsis N, Dudczig S, Kroehne V, Freudenreich D, Kaslin J & Brand M (2012) Regenerative  
13 neurogenesis from neural progenitor cells requires injury-induced expression of Gata3. *Dev.*  
14 *Cell* **23**: 1230–1237
- 15 Knopf F, Hammond C, Chekuru A, Kurth T, Hans S, Weber CW, Mahatma G, Fisher S, Brand M,  
16 Schulte-Merker S & Weidinger G (2011) Bone regenerates via dedifferentiation of osteoblasts  
17 in the zebrafish fin. *Dev. Cell* **20**: 713–724
- 18 Kragl M, Knapp D, Nacu E, Khattak S, Maden M, Epperlein HH & Tanaka EM (2009) Cells keep a  
19 memory of their tissue origin during axolotl limb regeneration. *Nature* **460**: 60–65
- 20 Kretzschmar K & Clevers H (2016) Organoids: Modeling Development and the Stem Cell Niche in  
21 a Dish. *Dev. Cell* **38**: 590–600
- 22 Kyritsis N, Kizil C, Zocher S, Kroehne V, Kaslin J, Freudenreich D, Iltzsche A & Brand M (2012)  
23 Acute inflammation initiates the regenerative response in the adult zebrafish brain. *Science*  
24 **338**: 1353–1356
- 25 Laurent P (1984) [Morphology and physiology of organs of aquatic respiration in vertebrates: the  
26 gill]. *J. Physiol. (Paris)* **79**: 98–112
- 27 Laurent P, Dunel-Erb S, chevalier C & Lignon J (1994) Gill epithelial cells kinetics in a freshwater  
28 teleost, *Oncorhynchus mykiss*
- 29 during adaptation to ion-poor water and hormonal treatments. *Fish Physiology* **13**: 353–370
- 30 Leguen I (2017) Gills of the medaka (*Oryzias latipes*): A scanning electron microscopy study. *J.*  
31 *Morphol.* **10**: 1048–1048
- 32 Liu J, Tan Y, Zhang H, Zhang Y, Xu P, Chen J, Poh Y-C, Tang K, Wang N & Huang B (2012) Soft  
33 fibrin gels promote selection and growth of tumorigenic cells. *Nat Mater* **11**: 734–741
- 34 Lust K, Sinn R, Pérez Saturnino A, Centanin L & Wittbrodt J (2016) De novo neurogenesis by  
35 targeted expression of *atoh7* to Müller glia cells. *Development* **143**: 1874–1883
- 36 McKenna A, Findlay GM, Gagnon JA, Horwitz MS, Schier AF & Shendure J (2016) Whole-organism  
37 lineage tracing by combinatorial and cumulative genome editing. *Science* **353**: aaf7907–

- 1 aaf7907
- 2 Meyerowitz EM (2002) Plants compared to animals: the broadest comparative study of  
3 development. *Science* **295**: 1482–1485
- 4 Mongera A, Singh AP, Levesque MP, Chen Y-Y, Konstantinidis P & Nüsslein-Volhard C (2013)  
5 Genetic lineage labeling in zebrafish uncovers novel neural crest contributions to the head,  
6 including gill pillar cells. *Development* **140**: 916–925
- 7 Morgan M (1974) Development of secondary lamellae of the gills of the trout, *Salmo gairdneri*  
8 (Richardson). *Cell Tissue Res.* **151**: 509–523
- 9 Nassar D & Blanpain C (2016) Cancer Stem Cells: Basic Concepts and Therapeutic Implications.  
10 *Annu Rev Pathol* **11**: 47–76
- 11 Oskarsson T, Acharyya S, Zhang XH-F, Vanharanta S, Tavazoie SF, Morris PG, Downey RJ,  
12 Manova-Todorova K, Brogi E & Massagué J (2011) Breast cancer cells produce tenascin C as a  
13 metastatic niche component to colonize the lungs. *Nat. Med.* **17**: 867–874
- 14 Pan YA, Freundlich T, Weissman TA, Schoppik D, Wang XC, Zimmerman S, Ciruna B, Sanes JR,  
15 Lichtman JW & Schier AF (2013) Zebrow: multispectral cell labeling for cell tracing and  
16 lineage analysis in zebrafish. **140**: 2835–2846
- 17 Quintana E, Shackleton M, Sabel MS, Fullen DR, Johnson TM & Morrison SJ (2008) Efficient  
18 tumour formation by single human melanoma cells. *Nature* **456**: 593–598
- 19 Reinhardt R, Centanin L, Tavhelidse T, Inoue D, Wittbrodt B, Concordet JP, Morales JRM &  
20 Wittbrodt J (2015) Sox2, Tlx, Gli3, and Her9 converge on Rx2 to define retinal stem cells  
21 in vivo. *The EMBO Journal* **34**: 1572–1588
- 22 Rembold M, Loosli F, Adams RJ & Wittbrodt J (2006) Individual cell migration serves as the driving  
23 force for optic vesicle evagination. *Science* **313**: 1130–1134
- 24 Sato T, Vries RG, Snippert HJ, van de Wetering M, Barker N, Stange DE, van Es JH, Abo A, Kujala P,  
25 Peters PJ & Clevers H (2009) Single Lgr5 stem cells build crypt-villus structures in vitro  
26 without a mesenchymal niche. *Nature* **459**: 262–265
- 27 Schepers AG, Snippert HJ, Stange DE, van den Born M, van Es JH, van de Wetering M & Clevers H  
28 (2012) Lineage tracing reveals Lgr5+ stem cell activity in mouse intestinal adenomas. *Science*  
29 **337**: 730–735
- 30 Scheres B (2007) Stem-cell niches: nursery rhymes across kingdoms. *Nat. Rev. Mol. Cell Biol.* **8**:  
31 345–354
- 32 Seery JP (2002) Stem cells of the oesophageal epithelium. *J Cell Sci* **115**: 1783–1789
- 33 Seleit A, Krämer I, Riebesehl BF, Ambrosio EM, Stolper JS, Lischik CQ, Dross N & Centanin L  
34 (2017) Neural stem cells induce the formation of their physical niche during organogenesis.  
35 *Elife* **6**: e29173
- 36 Singh SP, Janjuha S, Hartmann T, Kayisoglu Ö, Konantz J, Birke S, Murawala P, Alfar EA, Murata K,  
37 Eugster A, Tsuji N, Morrissey ER, Brand M & Ninov N (2017) Different developmental  
38 histories of beta-cells generate functional and proliferative heterogeneity during islet growth.

- 1        *Nat Commun* **8**: 664
- 2        Suetsugu-Maki R, Maki N, Nakamura K, Sumanas S, Zhu J, Del Rio-Tsonis K & Tsonis PA (2012)
- 3        Lens regeneration in axolotl: new evidence of developmental plasticity. *BMC Biol.* **10**: 103
- 4        Sundin L & Nilsson S (2002) Branchial innervation. *J. Exp. Zool.* **293**: 232–248
- 5        Suvà ML, Rheinbay E, Gillespie SM, Patel AP, Wakimoto H, Rabkin SD, Riggi N, Chi AS, Cahill DP,
- 6        Nahed BV, Curry WT, Martuza RL, Rivera MN, Rossetti N, Kasif S, Beik S, Kadri S, Tirosh I,
- 7        Wortman I, Shalek AK, et al (2014) Reconstructing and reprogramming the tumor-propagating
- 8        potential of glioblastoma stem-like cells. *Cell* **157**: 580–594
- 9        Tu S & Johnson SL (2011) Fate restriction in the growing and regenerating zebrafish fin. *Dev. Cell*
- 10       **20**: 725–732
- 11       Van Keymeulen A, Rocha AS, Ousset M, Beck B, Bouvencourt G, Rock J, Sharma N, Dekoninck S &
- 12       Blanpain C (2011) Distinct stem cells contribute to mammary gland development and
- 13       maintenance. *Nature* **479**: 189–193
- 14       Vermeulen L, De Sousa E Melo F, van der Heijden M, Cameron K, de Jong JH, Borovski T, Tuynman
- 15       JB, Todaro M, Merz C, Rodermond H, Sprick MR, Kemper K, Richel DJ, Stassi G & Medema JP
- 16       (2010) Wnt activity defines colon cancer stem cells and is regulated by the microenvironment.
- 17       *Nat. Cell Biol.* **12**: 468–476
- 18       Wilson JM & Laurent P (2002) Fish gill morphology: inside out. *J. Exp. Zool.* **293**: 192–213
- 19       Ye X, Tam WL, Shibue T, Kaygusuz Y, Reinhardt F, Ng Eaton E & Weinberg RA (2015) Distinct
- 20       EMT programs control normal mammary stem cells and tumour-initiating cells. *Nature* **525**:
- 21       256–260
- 22



## 1 **Figure legends**

2

3 **Figure 1. Growth and Homeostasis in the Medaka Gill.** (A) Enucleated entire gills of medaka at  
4 different post-embryonic times show that organ size increases during post-embryonic growth (**left**).  
5 A gill contains 4 pairs of branchial arches (**middle left**) that display numerous filaments (**middle**  
6 **right**). Filaments are composed of lamella (**right**), where gas exchange occurs. (B) Scheme depicting  
7 that branchial arches grow by increasing the number of filaments, and filaments grow by increasing  
8 its length. (C) The number of filaments per branchial arch is higher in bigger fish - x axis represents  
9 fish length, and y axis the number of filaments in the second right branchial arch. (D) IdU  
10 incorporation in the adult gill reflects proliferating cells all along the longitudinal axis of a  
11 filament.

12

13 **Figure 2. Gill Stem Cells Located at the Periphery of Branchial Arches Generate More**  
14 **Filaments Life-Long.** (A) Scheme showing the expected outcome assuming a progenitor (**left**  
15 **bottom**) or a stem cell (**right bottom**) model. (B) Entire gill from a double transgenic  $Gaudi^{Ubiq.iCre}$   
16  $Gaudi^{RSG}$  fish 2 month after induction with TMX. (C) Branchial arch from a double transgenic  
17  $Gaudi^{Ubiq.iCre} Gaudi^{RSG}$  fish two months after induction with TMX. Arrowheads in B and C indicate  
18 recombined embryonic filaments located at the centre of branchial arches, and asterisks indicate  
19 stretches of peripheral filaments with the same recombination status. (D) Graphs showing the  
20 distribution of switches in stretches of the 6 most peripheral filaments. The graphs show a  
21 comparison of the experimental data (black) to the expected distribution according to a progenitor  
22 model (light gray, left) and to a stem cell model (gray, right).

23

24 **Figure 3. Filament Growth Stem Cells are Located at the Apical Tip.** (A) Scheme showing the  
25 expected outcome of IdU *pulse & chase* experiments depending on the location of growth stem cells.  
26 (B) IdU *pulse & chase* experiment shows the apical region devoted of signal, indicating these cells  
27 were generated after the IdU pulse. (C) Scheme showing the expected outcome of a filament in  
28 which growth stem cells were labelled. (D) A filament from a double transgenic  $Gaudi^{Ubiq.iCre} Gaudi^{RSG}$   
29 fish one month after induction with TMX shows an expanding clone in the apical region, indicating  
30 a high proliferative activity compared to clones located at other coordinates along the longitudinal  
31 axis. (E, F). Scheme (E) and data (F) showing an IdU *pulse & chase* experiment on branchial arches.  
32 The apical part of each filament and the more peripheral filaments are devoted of signal revealing  
33 the stereotypic growth of branchial arches.

34

1 **Figure 4. Filament Growth Stem Cells are Fate Restricted.** (A-B) A gill (A) and a branchial arch  
2 (B) from a double transgenic  $Gaudi^{Ubiq.iCre} Gaudi^{RSG}$  fish two month after induction with TMX. (C-F)  
3 Confocal images from filaments in A, B, stained for EGFP and DAPI to reveal the cellular  
4 composition of different clones. Four different recombination patterns were identified. (G, G') A  
5 detailed view of Pattern 1(C) show recombined epithelial cells covering each lamella. (H) Co-  
6 staining with an anti- $Na^+K^+ATP$ -ase antibody confirms that MRC cells are clonal to other epithelial  
7 cells in the filament. (I, I') Cross-section of a filament that displays Pattern 2 (D). DAPI staining  
8 allows identifying blood cells (strong signal, small round nuclei), pillar cells (weaker signal, star-  
9 shaped nuclei), and chondrocytes (elongated nuclei at the central core of the filament) (I). The  
10 lineage tracker EGFP reveals that chondrocytes and pillar cells are clonal along a filament (I').

11  
12 **Figure 5. Branchial Arch Stem Cells are Fate Restricted.** (A) Scheme showing the expected  
13 outcome assuming that *br-archSCs* are fate restricted (*middle*) or multi-potent (*bottom*). The  
14 recombination pattern of consecutive filaments would be identical if generated by fate restricted  
15 *br-archSCs*, and non-identical if derived from a multipotent *br-archSC*. (B-E) Confocal images show  
16 an identical recombination pattern for peripheral filaments for Pattern 1 (B), Pattern 2 (C), Pattern  
17 3 (D) and Pattern 4 (E).

18  
19 **Figure 6. Homeostatic Stem Cells Locate to the Base of Each Lamella.** (A) DAPI image of  
20 peripheral filaments indicating the increasing number of lamellae per filament. (B) DAPI image of  
21 consecutive lamellae along a filament reveals that lamellae do not increase their size. (C) IdU pulse  
22 reveals proliferative cells at the base of the lamellae. (D-E) EGFP cells indicating clonal progression  
23 of clones in double transgenic  $Gaudi^{Ubiq.iCre} Gaudi^{RSG}$  fish one month after induction with TMX during  
24 adulthood. Clones of pillar cells progress from the base to the distal part of a lamellae (D', E).

25  
26 **Figure 7. The Homeostatic Domain Sustains Growth After Filament Ablation.** (A) Scheme of  
27 the ablation procedure. The growth domain and the upper part of the homeostatic domain are  
28 mechanically ablated. (B) DAPI image of control filaments shows an intact growth domain at the  
29 top. (C) DAPI image of injured filaments after a chase of one month shows a regenerated growth  
30 domain. (D) During the duration of the experiment, ablated filaments were unable to reach the  
31 length of their neighbour, non-ablated filaments.

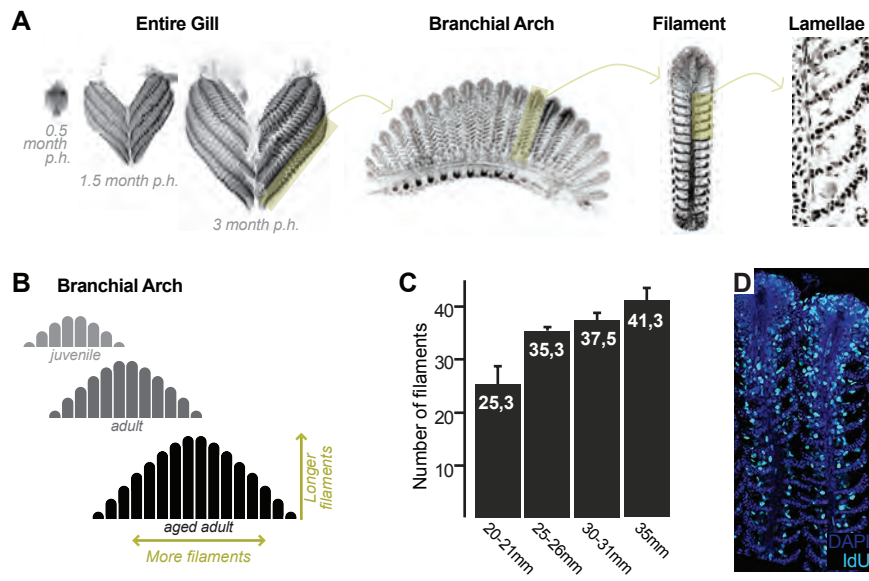

Stolper et al, Figure 1

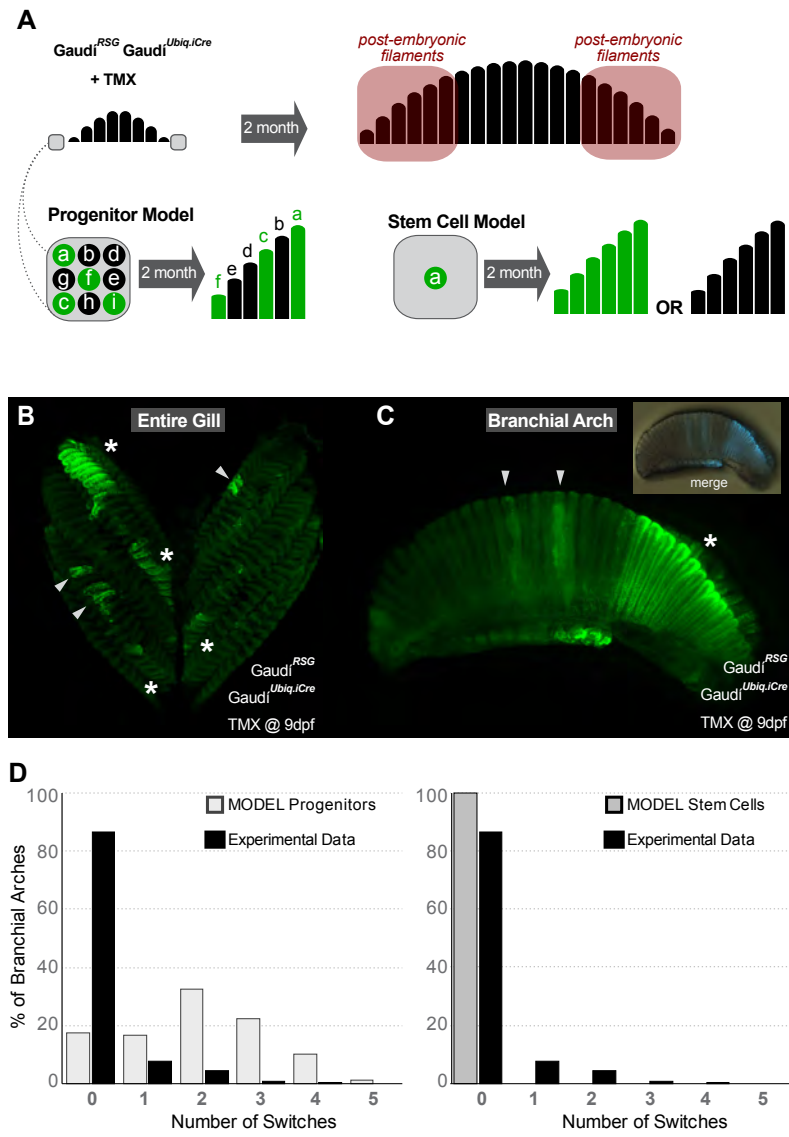

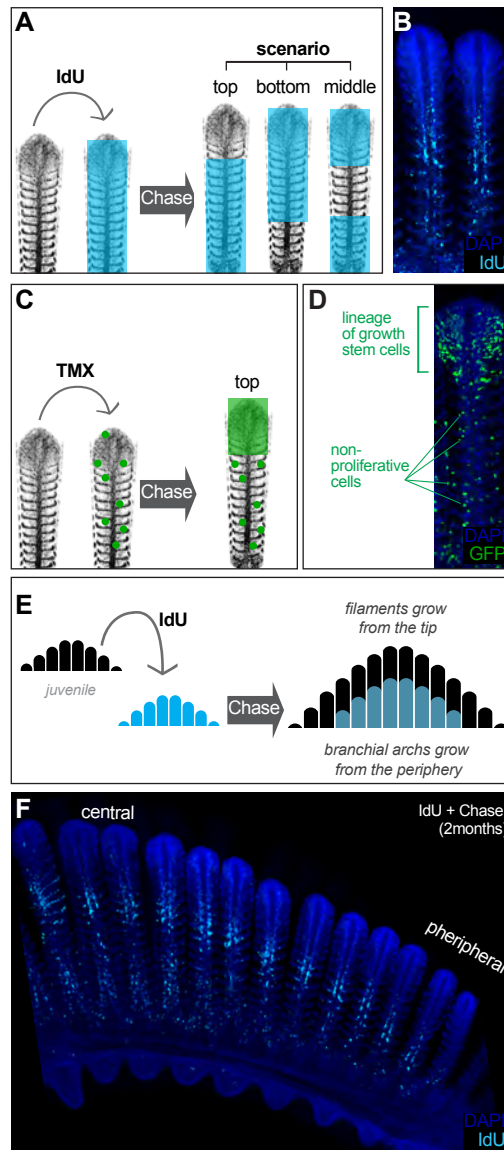

Stolper et al, Figure 3

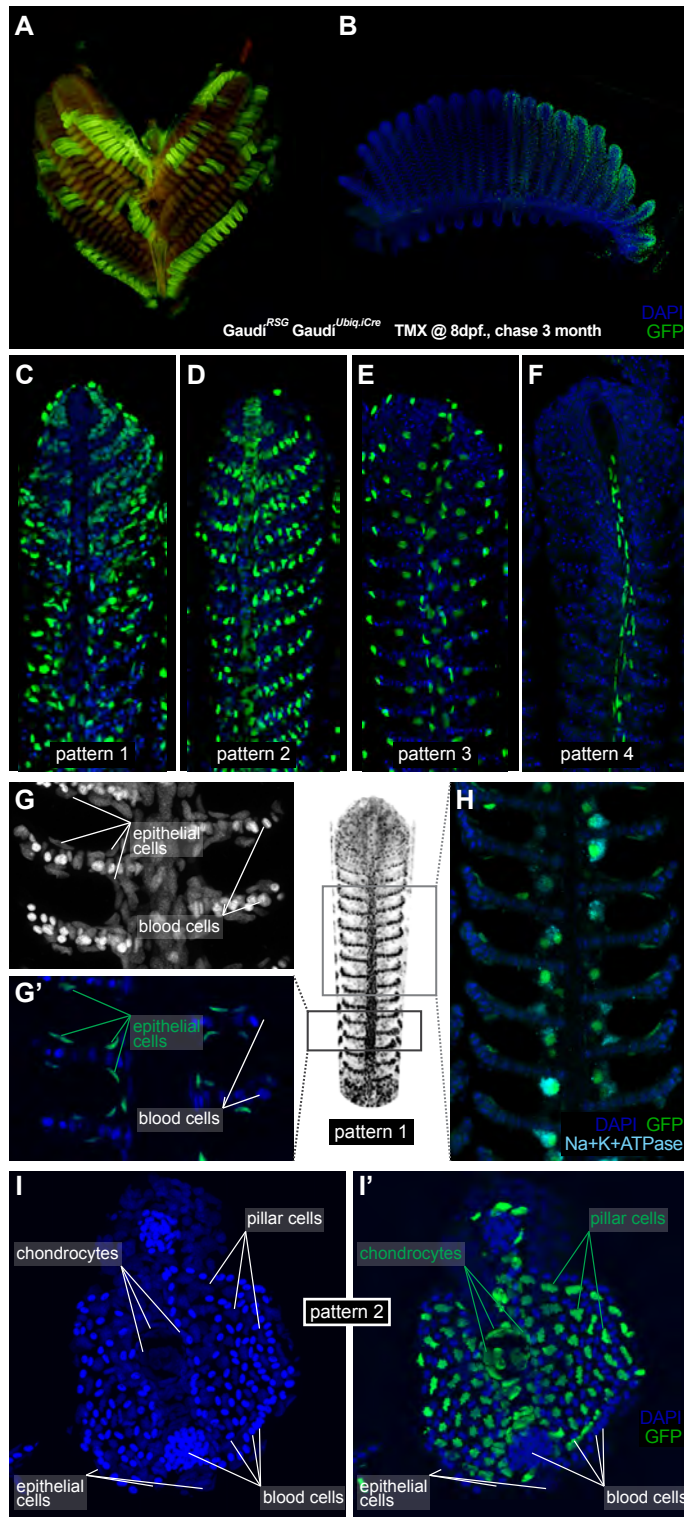

Stolper *et al*, Figure 4

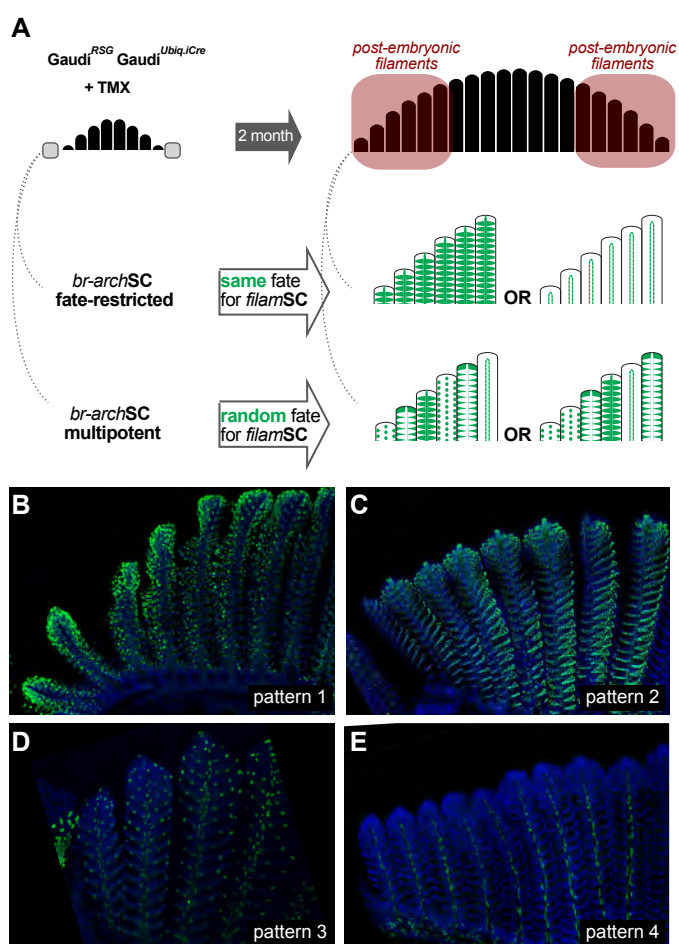

Stolper *et al*, Figure 5

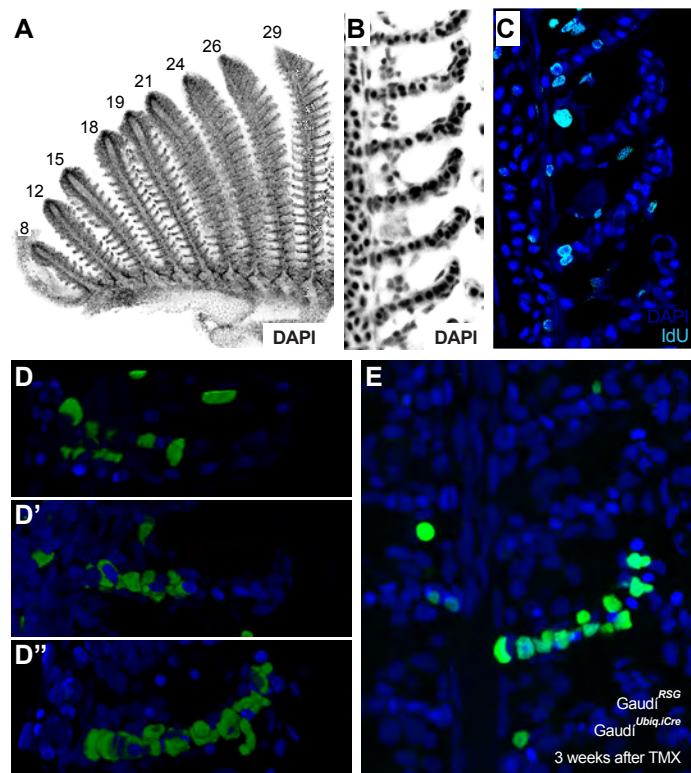

Stolper *et al*, Figure 6



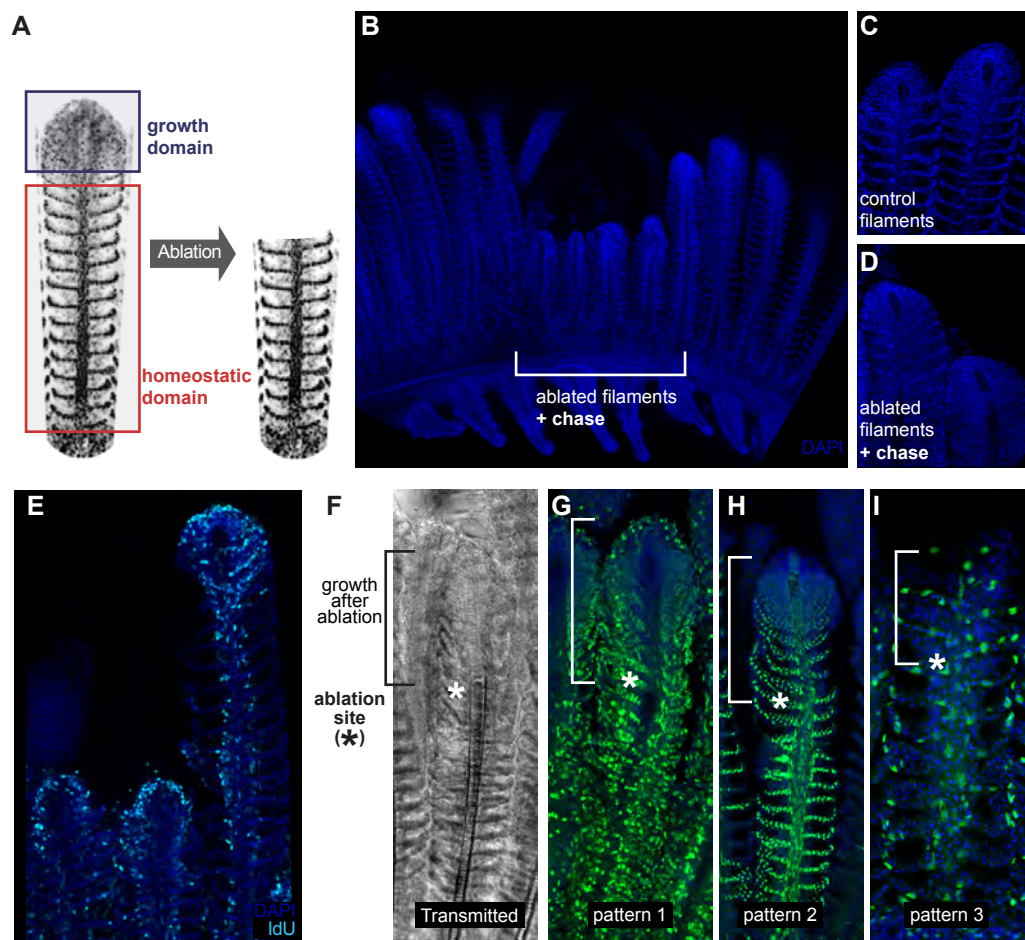

Stolper *et al*, Figure 7
